# Supplementary material
Source: PubMed Central journal article supplement (PMC4356825)
Supplement: AAC.05168-14_zac004153866so1.pdf [file AAC.05168-14_zac004153866so1.pdf]

## 1 **Materials and methods**

### 2 ***Bacterial isolates and antimicrobial susceptibility testing***

3 Species identification of isolates was carried out using a Vitek<sup>®</sup> 2 system  
4 (bioMérieux, France), 16S rRNA gene sequencing and 16S-23S rRNA gene intergenic  
5 spacer sequencing (1). Antimicrobial susceptibility testing was performed by microbroth  
6 dilution according to the Clinical and Laboratory Standards Institute (CLSI) (2). Etest<sup>®</sup>  
7 strips (bioMérieux) for imipenem and meropenem were selected for drug susceptibility  
8 tests. Carbapenemase activity was assessed with Etest<sup>®</sup> metallo-β-lactamases  
9 (imipenem/imipenem + EDTA).

### 10 ***Molecular detection of -lactamase production***

11 Carbapenemase, ESBL and AmpC resistance genes (*bla*<sub>IMP</sub>, *bla*<sub>VIM</sub>, *bla*<sub>KPC</sub>,  
12 *bla*<sub>OXA-23-like</sub>, *bla*<sub>OXA-24-like</sub>, *bla*<sub>OXA-51-like</sub>, *bla*<sub>OXA-58-like</sub>, *bla*<sub>SIM</sub>, *bla*<sub>SPM</sub>, *bla*<sub>GIM</sub>, *bla*<sub>SHV</sub>,  
13 *bla*<sub>TEM</sub>, *bla*<sub>CTX-M</sub>, *bla*<sub>OXA-2 group</sub>, *bla*<sub>OXA-10 group</sub>, *bla*<sub>PER</sub>, *bla*<sub>GES</sub>, *bla*<sub>VEB</sub>, *bla*<sub>PSEgroup</sub>, *bla*<sub>CMY-2</sub>  
14 and *bla*<sub>DHA-1</sub>) were screened by PCR (3-5). Aminoglycoside resistance genes  
15 (*bla*<sub>aac(6'')/aph(2'')</sub>, *bla*<sub>aac(6')-Ib</sub>, *bla*<sub>aac(3)-I</sub> and *bla*<sub>armA</sub>) were also detected by PCR (6). Positive  
16 PCR results were confirmed by sequencing. The nucleotide and deduced protein  
17 sequences were searched against the National Center for Biotechnology Information  
18 (NCBI) database.

### 19 ***Transconjugation assays and Southern blot analysis***

20 Horizontal transfer capability of the *bla*<sub>NDM</sub> gene was assessed by broth and filter  
21 mating using a standard *E. coli* J53 azide-resistant strain as the recipient. MacConkey

22 agar containing 100 mg/L sodium azide and 0.5 mg/L meropenem was used to select for  
23 *E. coli* J53 transconjugants (7). Putative transconjugants were confirmed by detection of  
24 *bla*<sub>NDM</sub> with PCR as described above.

25 Moreover, three enteric pathogens including *Shigella sonnei* Ss046, *Shigella flexneri*  
26 2a 301 and *Salmonella Serotype Paratyphi A* CMCC 50973 (stored in our laboratory)  
27 were used in the conjugation to detect whether or not resistant genes could transform into  
28 enteric pathogens. The transconjugants were separated by immunomagnetic beads (IMBS,  
29 Estapor Merck, France) separation techniques for three enteric pathogens, then selected  
30 on SS and MacConkey agar mediums (BD DIFCO, USA) with 0.5 mg/L meropenem. All  
31 of the transconjugants were identified by PCR for *bla*<sub>NDM</sub>.

32 Genomic DNA agarose blocks from clinical isolates and transconjugant strains were  
33 digested with the S1 endonuclease (Takara). DNA fragments were separated by PFGE  
34 with a CHEF-DR III apparatus (Bio-Rad, Hercules, USA) for 20 h at 6 V/cm and 14 °C,  
35 with initial and final pulse time of 5 s and 30 s, respectively. Southern blot analysis was  
36 performed to locate the *bla*<sub>NDM</sub> genes using specific *bla*<sub>NDM</sub> digoxigenin-labeled probes  
37 (Roche) (8). *Klebsiella pneumoniae* ATCC BAA-2146 was used as a positive control and  
38 *E. coli* J53 was used as a negative control.

### 39 ***Plasmid DNA sequencing, annotation and analysis***

40 Plasmid DNA was extracted using the BAC/PAC DNA Kit (Omega Biotek, Norcross,  
41 GA, USA) according to the manufacturer's protocol. Complete DNA sequences of  
42 plasmids were obtained using the Ion Torrent™ sequencing platform (9). Raw reads were

43 firstly assembled into contigs using Newbler version 2.9, followed by gap filling by local  
44 assembly. To ensure accuracy, complete genomes were confirmed and revised by  
45 mapping the raw reads onto the assembled genomes. Each assembled genome was  
46 annotated with the Rapid Annotations using Subsystems Technology (RAST) server and  
47 verified with the Basic Local Alignment Search Tool (BLAST) against the non-redundant  
48 NCBI database (<http://blast.ncbi.nlm.nih.gov/Blast.cgi>) (10).

#### 49 ***Cloning bla<sub>NDM-14</sub> and bla<sub>NDM-1</sub>***

50 To compare the relative contributions of NDM-1 and NDM-14 to carbapenem  
51 resistance, the entire open reading frame (primers NDM-F: 5'-CGGGATCCATGGAATT  
52 GCCCAATATTATG-3' and NDM-R: 5'-CCCAAGCTTTCAGCGCAGCTTGTCGGCCA  
53 T-3') and the complete gene with its native promoter (primers NP-NDM-F:  
54 5'-CGGGATCCCACCTCATGTTTGAATTCGC-3' and NP-NDM-R: 5'-CCCAAGCTTC  
55 TCTGTCACATCGAAATCGC-3') were amplified and cloned into the corresponding  
56 sites of pHSG398 (Takara Bio) (11, 12). *E. coli* DH5 cells were transformed with  
57 pHSG398-NDM-1, pHSG398-NDM-14, pHSG398-NP-NDM-1, and pHSG398-NP-ND  
58 M-14 to determine  $\beta$ -lactam MIC. The *A. lwoffii* clinical isolate JN49-1 and *A. lwoffii*  
59 JN247 genomes were used as PCR templates and gene cloning results were confirmed by  
60 sequencing.

#### 61 ***Kinetic Study, Native PAGE and In-Gel Activity Staining***

62 The open reading frames of NDM-1 and NDM-14 without signal peptide regions  
63 were cloned into the expression vector pET28a using the primer set *Bam*HI-TEV-NDM-

64 (5 -CGGGATCCGAAAACCTGTATTTCCAAGGCCAGCAAATGGAAACTGGCGA  
65 C-3 ) and *Xho*I-NDM-R (5 -CCGCTCGAGTCAGCGCAGCTTGTCGGCCATG-3)  
66 (12). *E. coli* BL21 (DE3) was used to express the the recombinant NDM proteins, which  
67 was purified by using the nickel-nitrilotriacetic acid (Ni-NTA) agarose according to the  
68 manufacturer's instruction (Qiagen). His tags were cleaved using the TurboTEV protease  
69 (Accelagen, San Diego, CA), and the tags and protease were removed by an additional  
70 passage over Ni-NTA agarose. The purity of the recombinant NDM proteins was  
71 estimated up to 90% by SDS-PAGE. The protein concentration was measured using the  
72 Pierce BCA Protein Assay Kit (Thermo Scientific, USA). The hydrolysis rates were  
73 monitored in 50mM phosphate buffer (pH7.0) at 37°C, using SpectraMax 190 microplate  
74 reader (Molecular Devices, USA). The  $K_m$ ,  $k_{cat}$  values and the  $k_{cat}/K_m$  ratios were  
75 determined using a Lineweaver-Burk plot. Wavelengths and extinction coefficients for  
76  $\beta$ -lactam substrates have been reported previously (13-15). Three individual experiments  
77 were performed to determine the  $K_m$  and  $k_{cat}$  values.

78 Native PAGE of NDM-1 and NDM-14 was performed according to protocols  
79 reported by Hu et al (16). The purified untagged protein were used in the native gel,  
80 which was immersed in a 0.5 mg/ml nitrocefin solution (Oxoid Ltd., Basingstoke,  
81 England) 10 min at 37°C to visualize the  $\beta$ -lactamase active band. The final loading  
82 amount of NDM proteins was 0.125 $\mu$ g, 0.25 $\mu$ g, 0.5 $\mu$ g and 1 $\mu$ g respectively.

83

84 **REFERENCES**

- 85 1. **Fu Y, Du X, Ji J, Chen Y, Jiang Y, Yu Y.** 2012. Epidemiological characteristics  
86 and genetic structure of blaNDM-1 in non-baumannii Acinetobacter spp. in China.  
87 J Antimicrob Chemother **67**:2114-2122.
- 88 2. **Institute. CaLS.** 2014. Performance standards for antimicrobial susceptibility  
89 testing: 24th informational supplement M100-S24. Clinical and Laboratory  
90 Standards Institute, Wayne, PA.
- 91 3. **Denisuik AJ, Lagacé-Wiens PR, Pitout JD, Mulvey MR, Simner PJ, Tailor F,**  
92 **Karlowsky JA, Hoban DJ, Adam HJ, Zhanel GG.** 2013. Molecular  
93 epidemiology of extended-spectrum -lactamase-, AmpC -lactamase-and  
94 carbapenemase-producing Escherichia coli and Klebsiella pneumoniae isolated  
95 from Canadian hospitals over a 5 year period: CANWARD 2007–11. Journal of  
96 Antimicrobial Chemotherapy **68**:i57-i65.
- 97 4. **Österblad M, Kirveskari J, Hakanen AJ, Tissari P, Vaara M, Jalava J.** 2012.  
98 Carbapenemase-producing Enterobacteriaceae in Finland: the first years (2008–  
99 11). Journal of Antimicrobial Chemotherapy **67**:2860-2864.
- 100 5. **Kiratisin P, Apisarnthanarak A, Laesripa C, Saifon P.** 2008. Molecular  
101 characterization and epidemiology of extended-spectrum- -lactamase-producing  
102 Escherichia coli and Klebsiella pneumoniae isolates causing health  
103 care-associated infection in Thailand, where the CTX-M family is endemic.  
104 Antimicrob Agents Chemother **52**:2818-2824.
- 105 6. **Akers KS, Chaney C, Barsoumian A, Beckius M, Zera W, Yu X, Guymon C,**

- 106        **Keen EF, Robinson BJ, Mende K.** 2010. Aminoglycoside resistance and  
107        susceptibility testing errors in *Acinetobacter baumannii-calcoaceticus* complex. *J*  
108        *Clin Microbiol* **48**:1132-1138.
- 109    7.    **Walsh TR, Weeks J, Livermore DM, Toleman MA.** 2011. Dissemination of  
110        NDM-1 positive bacteria in the New Delhi environment and its implications for  
111        human health: an environmental point prevalence study. *Lancet Infect Dis*  
112        **11**:355-362.
- 113    8.    **Borgia S, Lastovetska O, Richardson D, Eshaghi A, Xiong J, Chung C, Baqi**  
114        **M, McGeer A, Ricci G, Sawicki R, Pantelidis R, Low DE, Patel SN, Melano**  
115        **RG.** 2012. Outbreak of carbapenem-resistant enterobacteriaceae containing  
116        blaNDM-1, Ontario, Canada. *Clin Infect Dis* **55**:e109-117.
- 117    9.    **Merriman B, Torrent I, Rothberg JM, Team D.** 2012. Progress in Ion Torrent  
118        semiconductor chip based sequencing. *Electrophoresis* **33**:3397-3417.
- 119    10.   **Aziz RK, Bartels D, Best AA, DeJongh M, Disz T, Edwards RA, Formsma K,**  
120        **Gerdes S, Glass EM, Kubal M.** 2008. The RAST Server: rapid annotations using  
121        subsystems technology. *BMC genomics* **9**:75.
- 122    11.   **Tada T, Miyoshi-Akiyama T, Dahal RK, Sah MK, Ohara H, Kirikae T,**  
123        **Pokhrel BM.** 2013. NDM-8 metallo-beta-lactamase in a multidrug-resistant  
124        *Escherichia coli* strain isolated in Nepal. *Antimicrob Agents Chemother*  
125        **57**:2394-2396.
- 126    12.   **Tada T, Miyoshi-Akiyama T, Shimada K, Kirikae T.** 2014. Biochemical

- 127 analysis of metallo-beta-lactamase NDM-3 from a multidrug-resistant *Escherichia*  
128 *coli* strain isolated in Japan. *Antimicrob Agents Chemother* **58**:3538-3540.
- 129 13. **Boschi L, Mercuri PS, Riccio ML, Amicosante G, Galleni M, Frère J-M,**  
130 **Rossolini GM.** 2000. The *Legionella* (*Fluoribacter*) *gormanii* metallo-β-lactamase:  
131 a new member of the highly divergent lineage of molecular-subclass B3  
132 β-lactamases. *Antimicrob Agents Chemother* **44**:1538-1543.
- 133 14. **Queenan AM, Shang W, Flamm R, Bush K.** 2010. Hydrolysis and inhibition  
134 profiles of β-lactamases from molecular classes A to D with doripenem, imipenem,  
135 and meropenem. *Antimicrob Agents Chemother* **54**:565-569.
- 136 15. **Crowder MW, Walsh TR, Banovic L, Pettit M, Spencer J.** 1998.  
137 Overexpression, Purification, and Characterization of the Cloned  
138 Metallo-β-Lactamase L1 from *Stenotrophomonas maltophilia*. *Antimicrob Agents*  
139 *Chemother* **42**:921-926.
- 140 16. **Hu R-M, Chiang K-H, Chang Y-C, Yang T-C.** 2009. Characterization of the  
141 charge variants of L2 β-lactamase in *Stenotrophomonas maltophilia*. *J Med*  
142 *Microbiol* **58**:318-321.  
143  
144  
145

Supplemental Table 1. Primer pairs used for  $\beta$ -lactamase screening

| Primer pairs | Sequence                                                                  | $\beta$ -Lactamase detected | Product size (bp) |
|--------------|---------------------------------------------------------------------------|-----------------------------|-------------------|
| 1            | 5'-GGAATAGAGTGGCTTAAyTCTC-3'<br>5'-CCAAACyACTACGTTATCTkGAG-3'             | IMP                         | 188               |
| 2            | 5'-GATGGTGTTTGGTTCGCATA-3'<br>5'-CGAATGCGCAGCACCAG-3'                     | VIM                         | 390               |
| 3            | 5'-CTTGCTGCCGCTGTGCTG-3'<br>5'-GCAGGTTCCGGTTTTGTCTC-3'                    | KPC                         | 489               |
| 4            | 5'-GATGTGTCATAGTATTCGTCGT-3'<br>5'-TCACAACAATAAAAGCACTGT-3'               | OXA-23-like                 | 1058              |
| 5            | 5'-ATGAAAAAATTTATACTTCCTATATTTCAGC-3'<br>5'-TTAAATGATTCCAAG ATTTTCTAGC-3' | OXA-24-like                 | 828               |
| 6            | 5'-TAATGCTTTGATCGGCCTTG-3'<br>5'-TGGATTGCACTTCATCTTGG-3'                  | OXA-51-like                 | 353               |
| 7            | 5'-AAGTATTGGGGCTTGTGCTG-3'<br>5'-CCCCCTCTGCGCTCTACATAC-3'                 | OXA-58-like                 | 599               |
| 8            | 5'-TACAAGGGATTTCGGCATCG-3'<br>5'-TAATGGCCTGTTCCCATGTG-3'                  | SIM                         | 570               |
| 9            | 5'-CCTACAATCTAACGGCGACC-3'<br>5'-TCGCCGTGTCCAGGTATAAC-3'                  | SPM                         | 648               |
| 10           | 5'-CTTGTAGCGTTGCCAGCTTTA-3'<br>5'-CAGCCCAAGAGCTAATTGAGG-3'                | GIM                         | 562               |
| 11           | 5'-TGGTTATGCGTTATATTCGCC-3'<br>5'-GGTTAGCGTTGCCAGTGCT-3'                  | SHV                         | 868               |
| 12           | 5'-TCCGCTCATGAGACAATAACC-3'<br>5'-TTGGTCTGACAGTTACCAATGC-3'               | TEM                         | 931               |
| 13           | 5'-TCTTCCAGAATAAGGAATCCC-3'<br>5'-CCGTTTCCGCTATTACAAAC-3'                 | CTX-M                       | 909               |
| 14           | 5'-AAGAAACGCTACTCGCCTGC-3'<br>5'-CCACTCAACCCATCCTACCC-3'                  | OXA-2 group                 | 478               |
| 15           | 5'-GTCTTTCGAGTACGGCATT-3'<br>5'-ATTTTCTTAGCGGCAACTTAC-3'                  | OXA-10 group                | 720               |
| 16           | 5'-ATGAATGTCATCACAAAATG-3'<br>5'-TCAATCCGGACTCACT-3'                      | PER                         | 927               |
| 17           | 5'-ATGCGCTTCATTCACGCAC-3'<br>5'-CTATTTGTCCGTGCTCAGG-3'                    | GES                         | 864               |
| 18           | 5'-CGACTTCCATTTCCCGATGC-3'<br>5'-GGACTCTGCAACAAATACGC-3'                  | VEB                         | 644               |



|    |                                                             |                                     |     |
|----|-------------------------------------------------------------|-------------------------------------|-----|
| 19 | 5'-ACCGTATTGAGCCTGATTTA-3'<br>5'-ATTGAAGCCTGTGTTTGAGC-3     | PSE group (PSE-1,<br>PSE-4, CARB-3) | 321 |
| 20 | 5'-TTTCTCCTGAACGTGGCTGGC-3'<br>5'-TGGCCAGAACTGACAGGCAAA-3'  | CMY-2                               | 462 |
| 21 | 5'-AACTTTCACAGGTGTGCTGGGT-3'<br>5'-CCGTACGCATACTGGCTTTGC-3' | DHA-1                               | 405 |

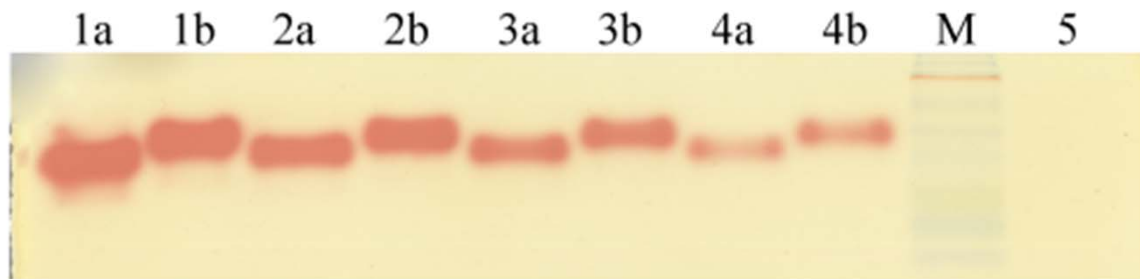

**Supplemental Figure 1.** Native page and in-gel activity staining by nitrocefin. Lane 1a, 2a, 3a and 4a were NDM-1; Lane 1b, 2b, 3b and 4b were NDM-14. M: protein maker, 5: blank control. Protein amount of lane 1a and 1b was 1 $\mu$ g, lane 2a and 2b was 0.5 $\mu$ g, lane 3a and 3b was 0.25 $\mu$ g, lane 4a and 4b was 0.125 $\mu$ g.
